# Supplementary material
Source: Springer Nature journal article supplement (https://www.springermedizin.de/resource/supplementary/13063_2014_2146_MOESM1_ESM.pdf/9621514)
Supplement: MOESM1 [file 9621514]

## NET-Trial additional File 1: overview of criteria for CT scanning in adults.

| &                                       | MAA NSW [1] and NSW ITIM [2]                                                                                                      | SIGN [3]                                                                                                   | NICE [4] and NZGG [5]                          | ACEP/CDC [6]                                                                               | Canadian CT Head Rule (CCTHR) [7]                                                             | New Orleans Criteria (NOC) [8]                                 | NEXUS-II criteria [9]          | CT in Head Injury Patients (CHIP) criteria [10]                                                                                                                              |
|-----------------------------------------|-----------------------------------------------------------------------------------------------------------------------------------|------------------------------------------------------------------------------------------------------------|------------------------------------------------|--------------------------------------------------------------------------------------------|-----------------------------------------------------------------------------------------------|----------------------------------------------------------------|--------------------------------|------------------------------------------------------------------------------------------------------------------------------------------------------------------------------|
| <b>Age</b>                              | √ (>65) <sup>#</sup>                                                                                                              | √ (≥65) IF LOC/amnesia                                                                                     | √ (≥65) IF LOC/amnesia                         | √ (≥65)<br><b>OR</b><br>>60 IF LOC/amnesia                                                 | √ (≥65) IF LOC / amnesia / witnessed disorientation                                           | √ (>60) IF LOC/amnesia                                         | √ (≥65)                        | √ (≥60)<br><b>OR</b><br>40-60 (minor <sup>^</sup> )                                                                                                                          |
| <b>GCS score</b>                        | √ (<15 2 hrs post-injury)<br><b>OR</b><br>Deteriorating GCS<br><b>OR</b><br>Persistent abnormal alertness / behaviour / cognition | √ (<15 2 hrs post-injury <b>OR</b> after 1 hr of obs)<br><b>OR</b><br>Deteriorating level of consciousness | √ (<15 2 hrs post-injury)                      | √ (<15)                                                                                    | √ (<15 2 hrs post-injury) IF LOC / amnesia / witnessed disorientation                         | Their definition only included patients with GCS 15            | Abnormal alertness / behaviour | √ (<15)<br><b>OR</b><br>Deteriorating GCS (≥2 points (1 hr after presentation))<br><b>OR</b><br>Deteriorating GCS 1 point 1 hr after presentation (minor)<br>√ (PTA ≥ 4 hrs) |
| <b>Amnesia</b>                          | Anterograde or retrograde >30 mins ([1] only)<br><b>OR</b><br>Persistent abnormal A-WPTAS score (<18 4 hrs post-injury)           | √ (retrograde >30 mins)                                                                                    | √ (for events > 30 mins before impact)         | √ (deficits in short term memory IF LOC/amnesia)                                           | √ (before impact ≥ 30 mins) IF LOC / amnesia / witnessed disorientation                       | √ (deficits in short term memory - anterograde) IF LOC/amnesia |                                | <b>OR</b><br>persistent anterograde (minor)<br><b>OR</b><br>PTA of 2 to 4 hrs (minor)                                                                                        |
| <b>Suspected skull fracture</b>         | √ Clinical suspicion of skull fracture                                                                                            | √ (basal, depressed or penetrating)                                                                        | √ (open or depressed <b>OR</b> signs of basal) | √ (physical signs of basilar)                                                              | √ (open or depressed <b>OR</b> any sign of basal) IF LOC / amnesia / witnessed disorientation |                                                                | √                              | √ (Clinical signs)                                                                                                                                                           |
| <b>Vomiting</b>                         | √ (≥2) [1]<br>√ (especially if recurrent) [2]                                                                                     | 2                                                                                                          | √ (>1)                                         | √                                                                                          | √ (≥2) IF LOC / amnesia / witnessed disorientation                                            | √ IF LOC/amnesia                                               | √ (persistent)                 | √                                                                                                                                                                            |
| <b>Coagulopathy</b>                     | √ (e.g. Warfarin; alcoholic)                                                                                                      | √ IF LOC/amnesia/ neurological feature                                                                     | √ IF LOC/amnesia                               | √                                                                                          | Exclusion criterion for applicability rule                                                    | Not evaluated due to low numbers of patients with coagulopathy | √                              | √ (use of therapy)                                                                                                                                                           |
| <b>Post traumatic seizure</b>           | √ (prolonged, focal or delayed)                                                                                                   | √                                                                                                          | √                                              | √ IF LOC/amnesia                                                                           |                                                                                               | √ IF LOC/amnesia                                               |                                | √                                                                                                                                                                            |
| <b>LOC</b>                              | √ (>5 mins)                                                                                                                       | √                                                                                                          | √                                              | √                                                                                          |                                                                                               |                                                                |                                | √ (minor)                                                                                                                                                                    |
| <b>Focal neurological deficit</b>       | √                                                                                                                                 | √                                                                                                          | √                                              | √                                                                                          |                                                                                               |                                                                | √                              | √ (minor)                                                                                                                                                                    |
| <b>Headache</b>                         | √ (persistent, severe)                                                                                                            | √ (severe and persistent)                                                                                  |                                                | √ IF LOC/amnesia<br><b>OR</b><br>severe<br>√ IF LOC/amnesia                                |                                                                                               | √ IF LOC/amnesia                                               |                                |                                                                                                                                                                              |
| <b>Drug and alcohol intoxication</b>    | √ (clinically obvious) [1] only                                                                                                   |                                                                                                            |                                                |                                                                                            |                                                                                               | √ IF LOC/amnesia                                               |                                |                                                                                                                                                                              |
| <b>Trauma</b>                           | √ (multi-system) <sup>#</sup><br><b>OR</b><br>Large scalp hematoma or laceration ([2] only) <sup>#</sup>                          |                                                                                                            |                                                | √ (visible, above clavicle IF LOC/amnesia)<br>(Multi-system trauma is exclusion criterion) |                                                                                               | √ (visible, above clavicle) IF LOC/amnesia                     | √ (scalp hematoma)             |                                                                                                                                                                              |
| <b>Dangerous \$ mechanism of injury</b> | √ <sup>#</sup>                                                                                                                    | √                                                                                                          | √ IF LOC/amnesia                               | √                                                                                          | √ IF LOC / amnesia / witnessed disorientation                                                 |                                                                |                                | √<br><b>OR</b><br>fall any elevation (minor)<br>√ (contusion skull (minor))                                                                                                  |
| <b>Other</b>                            | √ (Known neurosurgery / neurological impairment) <sup>#</sup><br>√ (Delayed presentation or re-presentation) <sup>#</sup>         |                                                                                                            |                                                |                                                                                            |                                                                                               |                                                                |                                |                                                                                                                                                                              |

# [1] notes that clinical judgement is required with these criteria; ^ [10] Minor = CT only indicated in the presence of at least 2 minor criteria

#### & Entry criteria / description of population

- [1] Guideline relevant for adults who sustain a mechanical injury or blow to the head from external forces (excluding complicated closed head injury; moderate/severe TBI; acquired brain injury; cerebral haemorrhage; skull fracture). Criteria include: 1) one or more of the following: confusion or disorientation, LOC <30 mins, PTA <24 hrs, and/or transient neurological abnormalities e.g. focal signs, seizures, intracranial lesions not requiring surgery; 2) GCS 14 or 15 at 30 mins post-injury or later upon presentation for health care; 3) GCS 13 at 30 mins post-injury or later upon presentation for health care and a normal CT scan. These manifestations must not be due to alcohol, drugs, medications and caused by other injuries.
- [2] Patients with initial GCS score of 14 or 15 on arrival at hospital following acute blunt head trauma (with or without a definite history of LOC or amnesia).
- [3] Patients with a history of a blow to the head or the presence of a scalp wound or those with evidence of altered consciousness after a relevant injury. Mild defined as GCS 13 to 15.
- [4] Any trauma to the head – other than superficial injuries. Mild defined as GCS 13 to 15.
- [5] TBI defined as acute brain injury resulting from mechanical energy to the head from external physical forces. Operational criteria include: confusion or disorientation; LOC; PTA; other neurological abnormalities such as focal neurological signs, seizure and / or intracranial lesion. These manifestations must not be due to alcohol, drugs, medications and caused by other injuries. Mild defined as GCS 13 to 15.
- [6] Inclusion criteria for relevance of guidance are: non-penetrating trauma to the head, presentation to the ED within 24 hrs of injury, GCS 14 or 15 on initial evaluation in ED, age 16 or greater. Exclusion criteria include: penetrating trauma; patients with multi-system trauma; GCS < 14 on initial evaluation in the ED, and age < 16 years.
- [7] Minor head injury defined as witnessed LOC, definite amnesia, or witnessed disorientation in patient with GCS 13 to 15
- [8] Minor head injury defined as LOC in patients with normal findings on brief neurological exam and GCS 15. LOC defined as witnessed or patient unable to remember the traumatic event.
- [9] Blunt head trauma patients – sub-population ‘minor’: GCS 15
- [10] Minor head injury patients defined as blunt injury to the head who have a normal or minimally altered level of consciousness on presentation (GCS 13 to 15 and max LOC 15 mins and PTA max 60 mins)

#### § Definitions regarding dangerous mechanisms

- [1, 2] Motor vehicle accident ejection / roll-over; pedestrians / cyclist hit by vehicle; falls > own height or five stairs; falls from horses / cycles etc.; focal blunt trauma, e.g. bat / ball / club.
- [3] Pedestrian struck by motor vehicle, occupant ejected from vehicle, significant fall from height, or significant assault (e.g. blunt trauma with weapon)
- [4, 5] Pedestrian struck by motor vehicle, occupant ejected from vehicle, or fall from height of greater than one metre or five stairs
- [6] Ejection from motor vehicle, a pedestrian struck, fall from a height > 3 feet or 5 stairs
- [7] Pedestrian struck by vehicle, occupant ejected from motor vehicle, fall from elevation ≥ 3 feet or 5 stairs
- [10] Pedestrian or cyclist versus vehicle OR ejected from vehicle

#### List of abbreviations

A-WPTAS, Abbreviated Westmead Post Traumatic Amnesia Scale; CT, Computed Tomography; ED, Emergency Department; GCS, Glasgow Coma Scale; hr(s), hour(s); LOC, Loss Of Consciousness; (m)TBI, (mild) Traumatic Brain Injury; mins, minutes; PTA, Post Traumatic Amnesia;

#### References

1. Motor Accident Authority New South Wales: **Guidelines for mild traumatic brain injury following closed head injury**. Sydney; 2008.
2. NSW Institute of Trauma and Injury Management: **Initial management of closed head injury in adults, second edition**: NSW Ministry of Health; 2011.
3. Scottish Intercollegiate Guidelines Network: **Early management of patients with a head injury. A national clinical guideline**: Edinburgh Scotland; 2009.
4. National Institute for Clinical Excellence: **Head injury. Triage, assessment, investigation and early management of head injury in infants, children and adults**. London, UK.
5. New Zealand Guidelines Group: **Traumatic Brain Injury: Diagnosis, Acute Management and Rehabilitation**. Wellington; 2006.
6. Jagoda AS, Bazarian JJ, Bruns JJ, Jr., Cantrill SV, Gean AD, Howard PK, Ghajar J, Riggio S, Wright DW, Wears RL *et al*: **Clinical policy: neuroimaging and decisionmaking in adult mild traumatic brain injury in the acute setting**. *Ann Emerg Med* 2008, **52**(6):714-748.
7. Stiell IG, Wells GA, Vandemheen K, Clement C, Lesiuk H, Laupacis A, McKnight RD, Verbeek R, Brison R, Cass D *et al*: **The Canadian CT Head Rule for patients with minor head injury**. *Lancet* 2001, **357**(9266):1391-1396.
8. Haydel MJ, Preston CA, Mills TJ, Luber S, Blaudeau E, DeBlieux PM: **Indications for computed tomography in patients with minor head injury**. *N Engl J Med* 2000, **343**(2):100-105.
9. Mower WR, Hoffman JR, Herbert M, Wolfson AB, Pollack CV, Jr., Zucker MI: **Developing a decision instrument to guide computed tomographic imaging of blunt head injury patients**. *J Trauma* 2005, **59**(4):954-959.
10. Smits M, Dippel DW, Steyerberg EW, de Haan GG, Dekker HM, Vos PE, Kool DR, Nederkoorn PJ, Hofman PA, Twijnstra A *et al*: **Predicting intracranial traumatic findings on computed tomography in patients with minor head injury: the CHIP prediction rule**. *Ann Intern Med* 2007, **146**(6):397-405.
